1 **Causal relationship between mental disorders and abdominal aortic aneurysm: insights**  
2 **from the genetic perspective**

3

4 **Short title:** Mental disorders and abdominal aortic aneurysm

5

6 Ming-Gang Deng<sup>1,2</sup>, Chen Chai<sup>3</sup>, Kai Wang<sup>4</sup>, Zhi-Hui Zhao<sup>5</sup>, Jia-Qi Nie<sup>6</sup>, Fang Liu<sup>7</sup>, Yuehui  
7 Liang<sup>7</sup>, Jiewei Liu<sup>1,2</sup>

8

9 <sup>1</sup> Department of Psychiatry, Wuhan Mental Health Center, Wuhan 430012, Hubei, China.

10 <sup>2</sup> Department of Psychiatry, Wuhan Hospital for Psychotherapy, Wuhan 430012, Hubei,  
11 China.

12 <sup>3</sup> Emergency Center, Hubei Clinical Research Center for Emergency and Resuscitation,  
13 Zhongnan Hospital of Wuhan University, Wuhan 430071, Hubei, China.

14 <sup>4</sup> Department of Public Health, Wuhan Fourth Hospital, Wuhan 430000, Hubei, China.

15 <sup>5</sup> School of Nursing, Shanghai Jiao Tong University, Shanghai 200025, China.

16 <sup>6</sup> Xiaogan Municipal Center for Disease Control and Prevention, Xiaogan 432000, Hubei,  
17 China.

18 <sup>7</sup> School of Public Health, Wuhan University, Wuhan 430071, Hubei, China.

19

20 **Correspondence:**

21 **Ming-Gang Deng**

22 ORCID: 0000-0002-3154-6909

23 Email: [deng.minggang@outlook.com](mailto:deng.minggang@outlook.com)

24 Address: Department of Psychiatry, Wuhan Mental Health Center, Wuhan 430012, Hubei,  
25 China.

26

27 **Jiewei Liu**

28 ORCID: 0009-0009-8265-8984

29 Email: [liujiewei@hust.edu.cn](mailto:liujiewei@hust.edu.cn)

30 Address: Department of Psychiatry, Wuhan Mental Health Center, Wuhan 430012, Hubei,  
31 China.

32

33 Word count: 5950

34 **Abstract**

35 **Objective:** This study investigated the genetic link between mental disorders—depression,  
36 schizophrenia (SCZ), and bipolar disorder (BIP)—and abdominal aortic aneurysm (AAA).

37 **Methods:** We used global/local genetic correlation analyses and identified shared genomic  
38 loci. Bidirectional univariable Mendelian Randomization (UMR) assessed causal directions,  
39 with multivariable MR (MVMR) refining the analysis. Mediation analyses examined if  
40 known AAA risk factors influenced this relationship.

41 **Results:** Global correlations showed positive links between depression, SCZ, and AAA, but  
42 not BIP. Local analyses identified specific genomic regions of correlation. We found 26, 141,  
43 and 10 shared loci for AAA with depression, SCZ, and BIP, respectively. UMR indicated  
44 significant associations between genetically predicted depression (OR 1.270; 95% CI  
45 1.071-1.504;  $p = 0.006$ ) and SCZ (OR 1.047; 95% CI 1.010-1.084;  $p = 0.011$ ) with AAA, but  
46 not BIP. These results were confirmed by MVMR analyses. Mediation analyses showed that  
47 smoking, hypertension, hyperlipidemia, and coronary atherosclerosis mediated the impact of  
48 depression on AAA while smoking mediated SCZ's impact.

49 **Conclusion:** This study provides evidence that genetically predicted depression and SCZ are  
50 linked to an increased risk of AAA, mediated by traditional AAA risk factors.

51 **Keywords:** Mental disorders; Abdominal aortic aneurysm; Mendelian Randomization;  
52 Genetic association.

## 53 **1. Introduction**

54 Abdominal aortic aneurysm (AAA) is a prevalent vascular disease marked by localized  
55 dilation of the abdominal aorta and is linked to an approximately 90% mortality risk due to  
56 rupture<sup>1</sup>. While recent open surgical repair and endovascular stent graft therapies have notably  
57 enhanced the treatment of AAA, there is currently no approved and effective  
58 pharmacotherapy to restrain and prevent AAA progression and rupture<sup>2,3</sup>. Consequently,  
59 primary preventive measures targeting the risk factors of AAA are necessary to reduce its  
60 incidence and adverse effects on health.

61 Mental disorders, such as depression, schizophrenia (SCZ), and bipolar disorder (BIP), have  
62 been found to lead to various adverse outcomes. For example, our previous studies revealed  
63 that individuals with depression or SCZ were more likely to be frail<sup>4,5</sup>. In addition, current  
64 evidence suggests that mental disorders are linked to higher risks of cardiovascular disease,  
65 which include but are not limited to heart failure, coronary artery disease, and hypertension<sup>6-8</sup>.  
66 Therefore, investigating the association between mental disorders and AAA is of vital  
67 importance for public health.

68 To our knowledge, the associations of AAA with SCZ and BIP are currently unclear, as no  
69 studies have reported them. In the case of depression and AAA, a prospective study based on  
70 the Korean National Health Insurance System database revealed that patients with AAA were  
71 more likely to be depressed<sup>9</sup>. Conversely, depressed individuals were found to have a higher  
72 risk of incident AAA in the Norwegian Nord-Trøndelag Health Study<sup>10</sup>. Despite this, the  
73 causative association between depression and AAA needs further investigation, as  
74 observational studies were susceptible to confounding bias, reverse causality, etc.

75 Recent large-scale genome-wide association studies (GWASs) have identified numerous  
76 genetic loci associated with depression<sup>11</sup>, SCZ<sup>12</sup>, BIP<sup>13</sup>, and AAA<sup>14</sup>. These findings enhance  
77 the statistical power and offer the opportunity to explore their genetic associations. In addition,  
78 Mendelian Randomization (MR), which uses genetic variants (single nucleotide  
79 polymorphisms, SNPs) as instruments, is a powerful method for obtaining robust causal  
80 inference<sup>15</sup> and has been widely utilized in recent epidemiological research<sup>16-18</sup>. As a result,  
81 this study aims to investigate the genetic correlation between AAA and mental disorders and  
82 to utilize the MR design to evaluate their causality.

## 83 **2. Methods and materials**

### 84 **2.1. Study design**

85 An overview of this research is presented in **Fig 1**. Initially, we explored the genetic

86 association between AAA and mental disorders from three perspectives: global genetic  
87 correlation, local genetic correlation, and identification of shared genomic loci. Following that,  
88 we utilized a bidirectional MR design to evaluate the causal association between AAA and  
89 mental disorders. Furthermore, mediation MR analyses were performed to ascertain whether  
90 the causality was mediated by known risk factors.

## 91 **2.2. Data sources and ethical approval**

92 The data sets utilized in this research were all publicly available from the previous studies,  
93 and the details were described in the **Supplementary Methods**. The ethical approvals were  
94 all obtained by the original papers, and thus the ethical approval for our study could be  
95 waived.

## 96 **2.3. Genetic association**

### 97 2.3.1. Global genetic correlation

98 We conducted a global genetic correlation analysis to estimate the correlation between the  
99 GWAS summary statistics of AAA and three mental disorders. Two different software tools  
100 were utilized to perform this analysis. The first one is Linkage disequilibrium score regression  
101 (LDSC, <https://github.com/bulik/ldsc>)<sup>19</sup>. We used the cross-trait LDSC which only requires  
102 the GWAS summary statistics that account for sample overlap. Cross-trait LDSC analysis  
103 requires the GWAS summary statistics to be from the same ethnic group. Since the GWAS  
104 summary statistics used in this study are largely from Europeans, we used the 1000 Genomes  
105 Project European samples as the reference sample for LD score calculation.

106 Another complementary method for estimating global genetic correlation is the Genetic  
107 Covariance Analyzer (GNOVA)<sup>20</sup>. GNOVA (available at  
108 <https://github.com/xtonyjiang/GNOVA>) also requires only the GWAS summary statistics as  
109 input to perform global genetic correlation analysis. The major advantage of GNOVA is its  
110 ability to include omic datasets (e.g., transcriptomic and epigenomic) in the GNOVA model.  
111 The LD score was also calculated using the 1000 Genomes European samples.

### 112 2.3.2. Local genetic correlation

113 In addition to estimating the global genetic correlation between the GWAS summary statistics  
114 of AAA and mental disorders, we also attempted to estimate the local genetic correlation  
115 between them in specific genomic regions. To perform this analysis, we used SUPERGNOVA  
116 (available at <https://github.com/qlu-lab/SUPERGNOVA>). SUPERGNOVA was developed  
117 within the previous GNOVA statistical framework, which includes functional annotation when  
118 estimating genetic correlation<sup>21</sup>. Similar to GNOVA, only GWAS summary statistics and an

119 LD calculation reference panel were needed as input to run SUPERGENOVA.

### 120 2.3.3. Shared genomic loci

121 To enhance the statistical power of detecting loci associated with both AAA and mental  
122 disorders, we utilized the conjunctive false discovery rate (conjFDR) method for this  
123 analysis. This method is based on standard FDR analysis and aims to identify SNPs that are  
124 associated with both target traits (e.g., SNPs that are jointly associated with AAA and SCZ).  
125 The conjFDR analysis is implemented in the pleioFDR software (available at  
126 <https://github.com/precimed/pleiofdr>), and it runs in the MATLAB environment<sup>22</sup>. The  
127 analysis followed the instructions of the pleioFDR tool with default parameters.

## 128 2.4. Causal inference

### 129 2.4.1. Univariate Mendelian Randomization

130 We initially performed the univariate Mendelian Randomization (UMR) to assess the causal  
131 association between mental disorders and AAA. The statistical analyses were conducted in  
132 two directions: 1) mental disorders as the exposures to check the effect of mental disorders on  
133 AAA, and 2) AAA as exposures to evaluate whether people with AAA had a likelihood to  
134 develop mental disorders.

135 Independent SNPs ( $R^2 < 0.001$ , window size = 10MB) were firstly screened at the  
136 genome-wide significance threshold ( $p < 5 \times 10^{-8}$ ) to ensure their robust association with  
137 exposure and freedom from linkage disequilibrium. Subsequently, the F statistic for each SNP  
138 was calculated using the formula  $\beta^2/se^2$ , and those with an  $F < 10$  were considered weak  
139 instruments and were excluded. The remaining SNPs were harmonized with the outcome data,  
140 and the palindromic genetic variants were eliminated at this stage. If any genetic variants were  
141 unavailable in the outcome data, they will be replaced by the proxied SNPs if possible. After  
142 the aforementioned procedures, the remaining SNPs were used for causal inference.

143 The inverse variance weighted (IVW) method was used as the primary approach to obtain the  
144 causal estimate, assuming the absence of average pleiotropic effects, and in this scenario, it is  
145 the most efficient method. Cochran's Q statistic was computed to assess the heterogeneity  
146 among the SNPs. If significant heterogeneity was detected ( $p < 0.05$ ), the IVW method would  
147 be applied under a random-effects model; otherwise, it would be applied under a fixed-effects  
148 model. Alongside the IVW method, several other approaches, such as MR-Egger, weighted  
149 median, MR-cML (constrained maximum likelihood), and MR-RAPS (robust adjusted profile  
150 score), were employed to evaluate the robustness of the findings. In the meantime, the  
151 MR-Egger regression intercept term was utilized to evaluate the presence of horizontal  
152 pleiotropy among the instruments.

#### 153 2.4.2. Multivariate Mendelian Randomization

154 The multivariate Mendelian Randomization (MVMR), which employs SNPs associated with  
155 various and potentially related exposures, is an extension of UMR that can detect the causal  
156 effects of many risk factors simultaneously<sup>23</sup>. Considering that the instrumental variables in  
157 the UMR may meanwhile be linked to secondary phenotypes and even to the risk factor of  
158 outcomes, which may violate the critical assumption of MR, we further carried out the  
159 MVMR to ascertain if the UMR estimates were affected by any confounders. The  
160 PhenoScanner V2, an expanded tool for searching human genotype-phenotype associations,  
161 was employed in advance to screen the secondary phenotypes with which the instrumental  
162 variables were associated<sup>24</sup>. The significant confounding phenotype ( $p < 1 \times 10^{-5}$ ) would then be  
163 included as a covariate in the MVMR model. Similar to the UMR analyses, the  
164 multivariable-adjusted effect sizes were primarily estimated by the IVW method, and  
165 supplemented by the MR-Egger, weighted median, and MR-cML methods.

#### 166 2.4.3. Mediation effect of known risk factors

167 After establishing the causal relationship between mental disorders and AAA, our objective is  
168 to delve deeper into whether this causality is mediated by known risk factors. For example,  
169 smoking, hypertension, hyperlipidemia, and coronary atherosclerosis (CA) have been  
170 identified as risk factors for AAA<sup>3</sup>. To assess their mediation role, a two-step UMR analysis  
171 was performed. The first step involved estimating the causal effects of mental disorders on  
172 smoking, hypertension, hyperlipidemia, and coronary atherosclerosis, and the second step  
173 involved estimating the causal effects of smoking, hypertension, hyperlipidemia, and CA on  
174 AAA. The mediation proportion was calculated based on the causal effect estimated by the  
175 IVW method, while other methods, including MR-Egger, weighted median, MR-cML, and  
176 MR-RAPS, were employed as sensitivity analyses.

### 177 **3. Results**

#### 178 **3.1. Genetic association**

##### 179 3.1.1. Global genetic correlation

180 The estimates of the global genetic correlation between mental disorders and AAA are  
181 presented in **Fig 2**. The LDSC method indicated that genetic variants related to depression  
182 [ $r_g = 0.157$ ,  $se = 0.023$ ,  $p = 3.52 \times 10^{-12}$ ] and SCZ ( $r_g = 0.042$ ,  $se = 0.020$ ,  $p = 0.042$ ) were  
183 positively correlated with AAA, while BIP was not ( $r_g = 0.013$ ,  $se = 0.023$ ,  $p = 0.591$ ).  
184 Additionally, the GNOVA method estimates further supported these findings, indicating a  
185 positive association of AAA with depression ( $r_g = 0.152$ ,  $se = 0.019$ ,  $p = 8.41 \times 10^{-16}$ ) and SCZ

186 ( $r_g = 0.053$ ,  $se = 0.017$ ,  $p = 0.002$ ). Conversely, BIP did not demonstrate a significant  
187 association with AAA ( $r_g = 0.021$ ,  $se = 0.019$ ,  $p = 0.272$ ).

### 188 3.1.2. Local genetic correlation

189 The local genetic correlation analyses revealed that mental disorders exhibited local  
190 correlations with AAA in various genomic regions, as detailed in **Table 1**. Following  
191 correction for multiple tests, depression was identified to have a positive association with  
192 AAA in four genomic regions (chr9: 126927204-128926989, chr10: 106139294-107874146,  
193 chr11: 42244050-42854352, and chr18: 77151867-78017074). Additionally, SCZ  
194 demonstrated a positive correlation with AAA in 9 out of 10 significant regions. While the  
195 global correlation did not indicate an association between BIP and AAA, the local analyses  
196 revealed correlations in 7 genomic regions, with 6 of them also showing a positive  
197 association.

### 198 3.1.3. Shared genetic variants

199 In line with the preceding analyses, a multitude of shared genetic variants have been discerned  
200 between mental disorders and AAA. The findings are meticulously outlined in **Fig. 3** and  
201 **Table S1**. Specifically, there are 26 independent SNPs shared between depression and AAA,  
202 with 21 of them demonstrating a consistent directional effect on both conditions. Similarly,  
203 SCZ and AAA exhibit the sharing of 141 independent loci, among which 21 loci manifest an  
204 opposing effect. Notably, only 10 genetic variants are concurrently associated with BIP and  
205 AAA, with 4 of them displaying the same directional effect.

## 206 3.2. Causal inference

### 207 3.2.1. Univariate Mendelian Randomization

208 We initially examined the bidirectional causal relationship between mental disorders and AAA  
209 using the UMR, and the results are illustrated in **Fig. 4**. In the forward analyses, the  
210 MR-Egger regression intercept suggested the absence of horizontal pleiotropy among the  
211 selected SNPs ( $p$  values all  $> 0.05$ ). The Cochran's Q test revealed significant heterogeneity  
212 among the instruments concerning depression (Cochran's Q = 163.448,  $p < 0.001$ ), SCZ  
213 (Cochran's Q = 333.578,  $p < 0.001$ ), and BIP (Cochran's Q = 32.604,  $p = 0.002$ ). Consequently,  
214 the primary causal inference utilized the random-effect IVW method. The IVW method  
215 revealed that people with depression (OR: 1.270, 95% CI: 1.071-1.504,  $p = 0.006$ ) and SCZ  
216 (OR: 1.047, 95% CI: 1.010-1.084,  $p = 0.011$ ) have a heightened susceptibility to AAA, while  
217 no causal effect of BIP on AAA was found (OR: 0.980, 95% CI: 0.896-1.121,  $p = 0.653$ ).

218 The findings mentioned above are supported by the weighted median, MR-CML, and  
219 MR-RAPS methods.

220 For the reverse analyses, the MR-Egger regression intercept also demonstrated there was no  
221 horizontal pleiotropy among the AAA-associated instrumental variables, and obvious  
222 heterogeneity was identified. The IVW method revealed that genetically predicted AAA  
223 showed no association with the risks of depression (OR: 1.010, 95% CI: 0.995-1.025,  $p =$   
224 0.190), SCZ (OR: 1.007, 95% CI: 0.968-1.048,  $p = 0.740$ ), as well as BIP (OR: 0.989, 95% CI:  
225 0.944-1.037,  $p = 0.646$ ), and these null associations were consistently supported by estimates  
226 from the MR-Egger, weighted median, MR-cML, and MR-RAPS methods.

### 227 3.2.2. Multivariate Mendelian Randomization

228 After performing the UMR, we proceeded with the MVMR to evaluate potential bias in the  
229 causal estimates due to confounding effects. The PhenoScanner revealed that instruments  
230 associated with mental disorders were predominantly linked to body mass index (BMI) (**Table**  
231 **S2**). Additionally, SNPs associated with AAA were found to be correlated with BMI, coronary  
232 heart disease (CAD), high-density lipoprotein cholesterol (HDL-C), low-density lipoprotein  
233 cholesterol (LDL-C), and total cholesterol (TC) (**Table S3**). Consequently, we conducted  
234 bidirectional MVMR to evaluate the multivariate-adjusted causal estimates between mental  
235 disorders and AAA. The forward analyses aimed to assess the effect of mental disorders on  
236 AAA with adjustments for BMI, while the reverse analyses aimed to evaluate the effect of  
237 AAA on mental disorders with adjustments for BMI, CAD, HDL-C, LDL-C, and TC.

238 The results of MVMR are presented in **Table S4**. The IVW method revealed that individuals  
239 with depression (OR: 1.315, 95% CI: 1.095-1.578,  $p = 0.003$ ) and SCZ (OR: 1.042, 95%  
240 CI: 1.0004-1.084,  $p = 0.048$ ) were correlated with a higher risk of AAA even after controlling  
241 the effect of BMI, while people with BIP were not (OR: 1.014, 95% CI: 0.955- 1.076,  $p =$   
242 0.652). Consistent with the results of UMR, the IVW methods also presented that genetically  
243 predicted AAA still showed no association with the risks of depression, SCZ, and BIP after  
244 adjustments for BMI, CAD, HDL-C, LDL-C, and TC. These bidirectional relationships were  
245 supported by the sensitivity analysis methods.

### 246 3.2.3. Mediation Mendelian Randomization

247 Since the UMR and MVMR only supported the causal effects of depression and SCZ on AAA,  
248 we would only investigate whether these two causalities were mediated by the known risk  
249 factors of AAA. As described in the methods section, we selected smoking, hypertension,  
250 hyperlipidemia, and CA as the four candidate mediating factors.

251 The results of mediation MR analyses are presented in **Table S5**. The first step MR analyses  
252 presented that genetically predicted depression was associated with increased odds ratio of  
253 smoking (OR: 1.236, 95% CI: 1.140-1.340,  $p < 0.001$ ), hypertension (OR: 1.206, 95% CI:

254 1.069-1.361,  $p = 0.002$ ), hyperlipidemia (OR: 1.200, 95% CI: 1.037-1.388,  $p = 0.015$ ), and  
255 CA (OR: 1.210, 95% CI: 1.078-1.359,  $p = 0.001$ ). In contrast, genetically predicted SCZ was  
256 only associated with an increased likelihood of smoking (OR: 1.047, 95% CI: 1.023-1.071,  $p$   
257  $<0.001$ ). The second step MR analyses demonstrated that genetically predicted smoking (OR:  
258 1.610, 95% CI: 1.449-1.788,  $p <0.001$ ), hypertension (OR: 1.218, 95% CI: 1.142-1.300,  $p$   
259  $<0.001$ ), hyperlipidemia (OR: 1.547, 1.288-1.857,  $p <0.001$ ), and CA (OR: 1.385, 95% CI:  
260 1.204-1.594,  $p <0.001$ ) were all associated with elevated risks of AAA. Based on the results  
261 of mediation MR findings, the causal effect of depression on AAA was mediated by smoking,  
262 hypertension, hyperlipidemia, and CA, while the causal effect of SCZ on AAA was mediated  
263 by smoking only (**Fig 5**).

#### 264 **4. Discussion**

265 We conducted an investigation into the relationship between mental disorders and AAA from  
266 the genetic perspective. Our findings provided solid evidence of the genetic correlation  
267 between AAA and depression as well as SCZ. Besides, the causal effects of depression and  
268 SCZ on AAA were identified, with known risk factors for AAA playing a mediating role.

269 Few studies have investigated the associations between mental disorders and AAA, with the  
270 evidence supporting the correlations between depression and AAA being limited. Furthermore,  
271 a study involving 574 participants from four centers in Australia suggested an insignificant  
272 association between depression and AAA growth<sup>25</sup>, contradicting conclusions drawn in  
273 previous studies from another perspective. Given the scarcity of research and the  
274 inconsistency of results, we conducted comprehensive genetic association, and univariate,  
275 multivariate as well as mediating MR to evaluate the correlation and causal links between  
276 mental disorders and AAA.

277 The global genetic correlation analyses indicated positive associations of AAA with  
278 depression and SCZ, and meanwhile, numerous locally correlated genomic regions and shared  
279 loci were identified. The genetic association analyses presented that AAA had plenty of  
280 genetic basis with mental disorders. The results of univariate and multivariate MR analyses  
281 demonstrated robust and statistically significant associations of depression, SCZ, and AAA,  
282 and we further extended our investigation through mediation analysis to delineate potential  
283 pathways underlying these associations. By incorporating well-established risk factors of  
284 AAA as potential mediators, significant mediation effects of smoking, hyperlipidemia, CA,  
285 and hypertension were identified in the causal pathways between depression and AAA, and  
286 the proportions of mediation effects were calculated as 42.22%, 32.20%, 26.05%, and 15.41%,

287 respectively. In addition, smoking exhibited a substantial mediation effect proportion of 47.60%  
288 in the association between SCZ and AAA. These findings underscore the pivotal role of  
289 smoking in the nexus between mental disorders and AAA, offering crucial insights for further  
290 etiological explorations.

291 While the pathological mechanism of AAA remains elusive, existing literature has elucidated  
292 a series of contributing processes, notably the infiltration and subsequent destruction of the  
293 aortic wall mediated by immune and inflammatory mechanisms<sup>26</sup>. Both innate and adaptive  
294 immune cells, including macrophages and T cells, have undergone extensive scrutiny in the  
295 pathogenesis of AAA, with several inflammasomes suggested to be involved in both the  
296 inhibition and amelioration of AAA<sup>27,28</sup>. NF- $\kappa$ B, the primary regulator of inflammation and  
297 immune response, is activated by multiple factors including angiotensin II, triggering  
298 macrophage infiltration, inflammation, and subsequent aortic deterioration<sup>29</sup>. Numerous  
299 studies have explored the impact of pharmacological inhibition of nucleotide-binding  
300 oligomerization domain-like receptor family protein 3 (NLRP3) inflammasome on  
301 experimental AAAs, revealing preventive effects characterized by reduced AAA diameter and  
302 incidence<sup>30-32</sup>, etc. Furthermore, the remarkable parallels between the immune system and the  
303 brain, both intricately integrated and complex systems associated with memory, imply  
304 intimate connections between immune responses and mental disorders. For instance, some  
305 researchers consider depression as an inflammatory disease<sup>33,34</sup>, with inflammation likely  
306 playing a critical role in heightening individual susceptibility to depression<sup>35</sup>. Similarly,  
307 extensive reviews have highlighted the central role of inflammation and immunity in SCZ,  
308 findings supported by both human and animal studies<sup>36,37</sup>. Several two-sample MR studies  
309 indicate the causal associations of inflammatory biomarkers such as C-reactive protein and  
310 soluble interleukin-6 receptor with SCZ, with anti-inflammation strategies emerging as  
311 therapeutic considerations<sup>38,39</sup>. Therefore, inflammation and immune responses may function  
312 as a conduit linking mental disorders and AAA.

313 Similar to other cardiovascular diseases (CVD), the relationship between mental disorders and  
314 AAA may also be explained by the shared etiological factors, encompassing genetic,  
315 biological, and behavioral mechanisms. Early in 2002, Bondy et al. found that the same allelic  
316 combination of two genes could increase the vulnerability for depressive disorder while also  
317 being associated with a higher risk of myocardial infarction<sup>40</sup>, suggesting the genetic  
318 associations between depression and CVD. Molecular genetic studies have further  
319 corroborated modest genetic correlations between severe mental illness and CVD<sup>41</sup>.

320 Furthermore, biological constituents such as neutrophil gelatinase associated lipocalin<sup>42</sup> and  
321 physiological processes like platelet receptors<sup>43</sup> and function have been implicated as  
322 mediating factors linking CVD and depression. Moreover, the overlap of behavioral  
323 determinants including smoking, physical inactivity, obesity, and poor diet was observed  
324 among participants affected by mental disorders and CVD. Similarly, GWAS studies have  
325 unveiled extensive genetic convergence between SCZ and CVD risk factors, with notable  
326 associations observed with smoking initiation and body mass index<sup>44</sup>.

327 Our study had several strengths worth pointing out. Firstly, we utilized the genetic data from  
328 the large-scale GWASs, which could significantly enhance the statistical power and avoid the  
329 confounding bias and reverse causality of observational studies. Additionally, we conducted  
330 two parts of analyses, including genetic correlation and causality inference, and the results  
331 provided consistent evidence on the causal effects of depression and SCZ on AAA.  
332 Furthermore, we identified the mediation effect, which highlighted the interactive impacts of  
333 mental disorders and other risk factors on the risk of AAA.

334 Despite these advantages, our findings should be interpreted in the context of limitations.  
335 Firstly, the most recent GWAS of BIP have identified various significant SNPs<sup>45</sup>, but the  
336 samples overlapped with the AAA. To avoid the causal inference bias due to sample overlap,  
337 we selected the genetic variants associated with BIP from the GWAS with relatively lower  
338 sample sizes<sup>13</sup>. Further studies were warranted to check the relationship between BIP and  
339 AAA. In addition, only the summary-level data could be obtained thus making us unable to  
340 perform the stratified analyses. At the same time, current knowledge indicates that the  
341 prevalence of AAA in males was higher than in females. Further research was needed to  
342 confirm our findings in specific sub-populations. Lastly, the samples were all of European  
343 ancestry, making our findings may not apply to other populations.

## 344 **5. Conclusion**

345 Genetically predicted depression and schizophrenia were associated with elevated risk of  
346 abdominal aortic aneurysm, and the known risk factors of abdominal aortic aneurysm played  
347 mediation roles.

## 348 **6. Declarations**

### 349 **6.1. Acknowledgement**

350 None.

### 351 **6.2. Ethical approval**

352 The datasets used in this study were all publicly available from previous studies, and the

353 ethical approvals were obtained by the original researchers. Therefore, the ethical approval for  
354 this study could be waived.

### 355 **6.3. Consent for publication**

356 Not applicable

### 357 **6.4. Data availability**

358 The datasets utilized in this study are publicly available; the details can be found in the  
359 supplementary method.

### 360 **6.5. Code availability**

361 ldscr (<https://github.com/bulik/ldsc>), GNOVA (<https://github.com/xtonyjiang/GNOVA>), SU  
362 PERGNOVA (<https://github.com/qiu-lab/SUPERGNOVA>), pleioFDR ([https://github.com/pr  
364 ecimed/pleiofdr](https://github.com/pr<br/>363 ecimed/pleiofdr)), TwoSampleMR (<https://mrcieu.github.io/TwoSampleMR/>), MendelianRa  
364 ndomization (<https://github.com/cran/MendelianRandomization>), and mr.raps ([https://github  
365 b.com/qingyuanzhao/mr.raps](https://github<br/>365 b.com/qingyuanzhao/mr.raps)).

### 366 **6.6. Competing interests**

367 The authors declare no conflict of interest.

### 368 **6.7. Funding**

369 This work receives no external funding.

### 370 **6.8. Author contributions**

371 **Ming-Gang Deng:** Conceptualization, Methodology, Data Curation, Formal Analysis, and  
372 Writing - Original Draft; **Chen Chai:** Writing - Original Draft; Kai Wang: Writing - Original  
373 Draft; **Zhi-Hui Zhao:** Writing – review & editing; **Jia-Qi Nie:** Writing – review & editing;  
374 **Fang Liu:** Writing – review & editing; **Yuehui Liang:** Writing – review & editing; **Jiewei  
375 Liu:** Conceptualization, and Writing - Original Draft.

## 376 **7. Reference**

- 377 1. Summers KL, Kerut EK, Sheahan CM, Sheahan MG, 3rd. Evaluating the prevalence of  
378 abdominal aortic aneurysms in the United States through a national screening database.  
379 *Journal of vascular surgery*. 2021;73(1):61-68.
- 380 2. Davis FM, Rateri DL, Daugherty A. Abdominal aortic aneurysm: novel mechanisms and  
381 therapies. *Current opinion in cardiology*. 2015;30(6):566-573.
- 382 3. Zhang F, Li K, Zhang W, et al. Ganglioside GM3 Protects Against Abdominal Aortic  
383 Aneurysm by Suppressing Ferroptosis in Vascular Smooth Muscle Cells. *Circulation*.  
384 2023.

- 385 4. Deng MG, Liu F, Liang Y, Wang K, Nie JQ, Liu J. Association between frailty and  
386 depression: A bidirectional Mendelian randomization study. *Science advances*.  
387 2023;9(38):eadi3902.
- 388 5. Deng M-G, Wang K, Liu F, Zhou X, Liu J. The Relationship Between Frailty and  
389 Schizophrenia: A Genetic Association and Mendelian Randomization Study. 2023.
- 390 6. Li GH, Cheung CL, Chung AK, et al. Evaluation of bi-directional causal association  
391 between depression and cardiovascular diseases: a Mendelian randomization study.  
392 *Psychological medicine*. 2022;52(9):1765-1776.
- 393 7. Veeneman RR, Vermeulen JM, Abdellaoui A, et al. Exploring the Relationship Between  
394 Schizophrenia and Cardiovascular Disease: A Genetic Correlation and Multivariable  
395 Mendelian Randomization Study. *Schizophrenia bulletin*. 2022;48(2):463-473.
- 396 8. So HC, Chau KL, Ao FK, Mo CH, Sham PC. Exploring shared genetic bases and causal  
397 relationships of schizophrenia and bipolar disorder with 28 cardiovascular and  
398 metabolic traits. *Psychological medicine*. 2019;49(8):1286-1298.
- 399 9. Kim MH, Yoo JH, Cho HJ, et al. Increased depression risk in patients with abdominal  
400 aortic aneurysm: a nationwide cohort study. *Annals of surgical treatment and research*.  
401 2021;101(5):291-298.
- 402 10. Nyrønning L, Stenman M, Hultgren R, Albrektsen G, Videm V, Mattsson E. Symptoms  
403 of Depression and Risk of Abdominal Aortic Aneurysm: A HUNT Study. *Journal of the*  
404 *American Heart Association*. 2019;8(21):e012535.
- 405 11. Howard DM, Adams MJ, Clarke TK, et al. Genome-wide meta-analysis of depression  
406 identifies 102 independent variants and highlights the importance of the prefrontal brain  
407 regions. *Nature neuroscience*. 2019;22(3):343-352.
- 408 12. Trubetskoy V, Pardiñas AF, Qi T, et al. Mapping genomic loci implicates genes and  
409 synaptic biology in schizophrenia. *Nature*. 2022;604(7906):502-508.
- 410 13. Stahl EA, Breen G, Forstner AJ, et al. Genome-wide association study identifies 30 loci  
411 associated with bipolar disorder. *Nature genetics*. 2019;51(5):793-803.
- 412 14. Roychowdhury T, Klarin D, Levin MG, et al. Genome-wide association meta-analysis  
413 identifies risk loci for abdominal aortic aneurysm and highlights PCSK9 as a therapeutic  
414 target. *Nature genetics*. 2023;55(11):1831-1842.
- 415 15. Emdin CA, Khera AV, Kathiresan S. Mendelian Randomization. *Jama*.  
416 2017;318(19):1925-1926.

- 417 16. Deng MG, Cui HT, Nie JQ, Liang Y, Chai C. Genetic association between circulating  
418 selenium level and the risk of schizophrenia in the European population: A two-sample  
419 Mendelian randomization study. *Frontiers in nutrition*. 2022;9:969887.
- 420 17. Deng MG, Liu F, Wang K, Liang Y, Nie JQ, Chai C. Genetic association between  
421 coffee/caffeine consumption and the risk of obstructive sleep apnea in the European  
422 population: a two-sample Mendelian randomization study. *European journal of nutrition*.  
423 2023;62(8):3423-3431.
- 424 18. Yu X, Deng MG, Tang ZY, Zhang ZJ. Urticaria and increased risk of rheumatoid  
425 arthritis: a two-sample Mendelian randomisation study in European population. *Modern  
426 rheumatology*. 2022;32(4):736-740.
- 427 19. Bulik-Sullivan B, Finucane HK, Anttila V, et al. An atlas of genetic correlations across  
428 human diseases and traits. *Nature genetics*. 2015;47(11):1236-1241.
- 429 20. Lu Q, Li B, Ou D, et al. A Powerful Approach to Estimating Annotation-Stratified  
430 Genetic Covariance via GWAS Summary Statistics. *American journal of human  
431 genetics*. 2017;101(6):939-964.
- 432 21. Zhang Y, Lu Q, Ye Y, et al. SUPERGNOVA: local genetic correlation analysis reveals  
433 heterogeneous etiologic sharing of complex traits. *Genome biology*. 2021;22(1):262.
- 434 22. Andreassen OA, Thompson WK, Schork AJ, et al. Improved detection of common  
435 variants associated with schizophrenia and bipolar disorder using pleiotropy-informed  
436 conditional false discovery rate. *PLoS genetics*. 2013;9(4):e1003455.
- 437 23. Sanderson E. Multivariable Mendelian Randomization and Mediation. *Cold Spring  
438 Harbor perspectives in medicine*. 2021;11(2).
- 439 24. Kamat MA, Blackshaw JA, Young R, et al. PhenoScanner V2: an expanded tool for  
440 searching human genotype-phenotype associations. *Bioinformatics (Oxford, England)*.  
441 2019;35(22):4851-4853.
- 442 25. Thanigaimani S, Phie J, Quigley F, et al. Association of Diagnosis of Depression and  
443 Small Abdominal Aortic Aneurysm Growth. *Annals of vascular surgery*.  
444 2022;79:256-263.
- 445 26. Márquez-Sánchez AC, Koltsova EK. Immune and inflammatory mechanisms of  
446 abdominal aortic aneurysm. *Frontiers in immunology*. 2022;13:989933.
- 447 27. Yuan Z, Lu Y, Wei J, Wu J, Yang J, Cai Z. Abdominal Aortic Aneurysm: Roles of  
448 Inflammatory Cells. *Frontiers in immunology*. 2020;11:609161.

- 449 28. Raffort J, Lareyre F, Clément M, Hassen-Khodja R, Chinetti G, Mallat Z. Monocytes  
450 and macrophages in abdominal aortic aneurysm. *Nature reviews Cardiology*.  
451 2017;14(8):457-471.
- 452 29. Li Z, Kong W. Cellular signaling in Abdominal Aortic Aneurysm. *Cellular signalling*.  
453 2020;70:109575.
- 454 30. Tsuruda T, Kato J, Hatakeyama K, et al. Adventitial mast cells contribute to  
455 pathogenesis in the progression of abdominal aortic aneurysm. *Circulation research*.  
456 2008;102(11):1368-1377.
- 457 31. Yamanouchi D, Morgan S, Kato K, Lengfeld J, Zhang F, Liu B. Effects of caspase  
458 inhibitor on angiotensin II-induced abdominal aortic aneurysm in apolipoprotein  
459 E-deficient mice. *Arteriosclerosis, thrombosis, and vascular biology*.  
460 2010;30(4):702-707.
- 461 32. Kaneko H, Anzai T, Morisawa M, et al. Resveratrol prevents the development of  
462 abdominal aortic aneurysm through attenuation of inflammation, oxidative stress, and  
463 neovascularization. *Atherosclerosis*. 2011;217(2):350-357.
- 464 33. Berk M, Williams LJ, Jacka FN, et al. So depression is an inflammatory disease, but  
465 where does the inflammation come from? *BMC medicine*. 2013;11:200.
- 466 34. Halaris A. Inflammation and depression but where does the inflammation come from?  
467 *Current opinion in psychiatry*. 2019;32(5):422-428.
- 468 35. Beurel E, Toups M, Nemeroff CB. The Bidirectional Relationship of Depression and  
469 Inflammation: Double Trouble. *Neuron*. 2020;107(2):234-256.
- 470 36. Müller N. Inflammation in Schizophrenia: Pathogenetic Aspects and Therapeutic  
471 Considerations. *Schizophrenia bulletin*. 2018;44(5):973-982.
- 472 37. Khandaker GM, Cousins L, Deakin J, Lennox BR, Yolken R, Jones PB. Inflammation  
473 and immunity in schizophrenia: implications for pathophysiology and treatment. *The  
474 lancet Psychiatry*. 2015;2(3):258-270.
- 475 38. Hartwig FP, Borges MC, Horta BL, Bowden J, Davey Smith G. Inflammatory  
476 Biomarkers and Risk of Schizophrenia: A 2-Sample Mendelian Randomization Study.  
477 *JAMA psychiatry*. 2017;74(12):1226-1233.
- 478 39. Williams JA, Burgess S, Suckling J, et al. Inflammation and Brain Structure in  
479 Schizophrenia and Other Neuropsychiatric Disorders: A Mendelian Randomization  
480 Study. *JAMA psychiatry*. 2022;79(5):498-507.

- 481 40. Bondy B, Baghai TC, Zill P, et al. Combined action of the ACE D- and the G-protein  
482 beta3 T-allele in major depression: a possible link to cardiovascular disease? *Molecular*  
483 *psychiatry*. 2002;7(10):1120-1126.
- 484 41. Amare AT, Schubert KO, Klingler-Hoffmann M, Cohen-Woods S, Baune BT. The  
485 genetic overlap between mood disorders and cardiometabolic diseases: a systematic  
486 review of genome wide and candidate gene studies. *Translational psychiatry*.  
487 2017;7(1):e1007.
- 488 42. Gouweleeuw L, Naudé PJ, Rots M, DeJongste MJ, Eisel UL, Schoemaker RG. The role  
489 of neutrophil gelatinase associated lipocalin (NGAL) as biological constituent linking  
490 depression and cardiovascular disease. *Brain, behavior, and immunity*. 2015;46:23-32.
- 491 43. Amadio P, Zarà M, Sandrini L, Ieraci A, Barbieri SS. Depression and Cardiovascular  
492 Disease: The Viewpoint of Platelets. *International journal of molecular sciences*.  
493 2020;21(20).
- 494 44. Rødevand L, Rahman Z, Hindley GFL, et al. Characterizing the Shared Genetic  
495 Underpinnings of Schizophrenia and Cardiovascular Disease Risk Factors. *The*  
496 *American journal of psychiatry*. 2023;180(11):815-826.
- 497 45. Mullins N, Forstner AJ, O'Connell KS, et al. Genome-wide association study of more  
498 than 40,000 bipolar disorder cases provides new insights into the underlying biology.  
499 *Nature genetics*. 2021;53(6):817-829.
- 500

501 **Table 1. Locally correlated genomic regions between mental disorders and abdominal aortic aneurysm.**

| Trait1&Trait2    | chr | start     | end       | rho       | corr   | h <sup>2</sup> _1 | h <sup>2</sup> _2 | var      | m   | p-value  | p.adjust |
|------------------|-----|-----------|-----------|-----------|--------|-------------------|-------------------|----------|-----|----------|----------|
| Depression & AAA | 9   | 126927204 | 128926989 | 7.98E-05  | 0.945  | 7.26E-05          | 9.81E-05          | 2.47E-10 | 644 | 3.78E-07 | 8.57E-04 |
| Depression & AAA | 10  | 106139294 | 107874146 | 6.17E-05  | 1.112  | 1.40E-05          | 2.19E-04          | 1.72E-10 | 758 | 2.58E-06 | 2.93E-03 |
| Depression & AAA | 11  | 42244050  | 42854352  | 4.31E-05  | 1.130  | 2.05E-05          | 7.07E-05          | 9.28E-11 | 277 | 7.83E-06 | 5.92E-03 |
| Depression & AAA | 18  | 77151867  | 78017074  | 4.62E-05  | 1.159  | 2.74E-05          | 5.79E-05          | 1.12E-10 | 323 | 1.30E-05 | 7.37E-03 |
| SCZ & AAA        | 2   | 73174848  | 74121000  | 7.41E-05  | 0.907  | 1.61E-05          | 4.15E-04          | 3.73E-10 | 277 | 1.24E-04 | 2.84E-02 |
| SCZ & AAA        | 2   | 232791948 | 233964632 | -1.38E-04 | -1.021 | 2.56E-05          | 7.19E-04          | 6.93E-10 | 514 | 1.44E-07 | 1.64E-04 |
| SCZ & AAA        | 5   | 73508509  | 75240469  | 1.21E-04  | 0.792  | 9.10E-05          | 2.57E-04          | 9.36E-10 | 766 | 7.55E-05 | 2.46E-02 |
| SCZ & AAA        | 10  | 106139294 | 107874146 | 1.16E-04  | 1.355  | 1.40E-05          | 5.21E-04          | 7.46E-10 | 759 | 2.28E-05 | 1.30E-02 |
| SCZ & AAA        | 10  | 130282817 | 131192968 | 1.08E-04  | 1.746  | 3.02E-05          | 1.27E-04          | 7.75E-10 | 576 | 1.02E-04 | 2.59E-02 |
| SCZ & AAA        | 11  | 16790799  | 18788126  | 1.76E-04  | 0.722  | 6.85E-05          | 8.64E-04          | 1.90E-09 | 974 | 5.51E-05 | 2.19E-02 |
| SCZ & AAA        | 12  | 2176265   | 2886299   | 9.31E-05  | 0.815  | 6.39E-06          | 2.04E-03          | 5.36E-10 | 367 | 5.76E-05 | 2.19E-02 |
| SCZ & AAA        | 14  | 102341650 | 104759919 | 2.23E-04  | 0.671  | 8.11E-05          | 1.37E-03          | 2.12E-09 | 801 | 1.28E-06 | 9.75E-04 |
| SCZ & AAA        | 15  | 78640760  | 79259009  | 2.80E-04  | 0.777  | 1.88E-04          | 6.91E-04          | 1.27E-09 | 202 | 3.75E-15 | 8.56E-12 |
| SCZ & AAA        | 17  | 820511    | 1480393   | 1.05E-04  | 1.043  | 2.83E-05          | 3.56E-04          | 7.27E-10 | 264 | 1.01E-04 | 2.59E-02 |
| BIP & AAA        | 2   | 73174848  | 74121000  | 8.47E-05  | 1.036  | 1.61E-05          | 4.15E-04          | 4.64E-10 | 277 | 8.37E-05 | 3.01E-02 |
| BIP & AAA        | 8   | 24457122  | 25461315  | -2.03E-04 | -0.944 | 7.38E-05          | 6.29E-04          | 1.71E-09 | 466 | 9.08E-07 | 1.04E-03 |
| BIP & AAA        | 12  | 47505424  | 48267360  | 1.90E-04  | 1.252  | 5.57E-05          | 4.15E-04          | 1.27E-09 | 379 | 9.37E-08 | 2.14E-04 |
| BIP & AAA        | 15  | 66948951  | 68640917  | 2.27E-04  | 1.046  | 9.96E-05          | 4.72E-04          | 2.86E-09 | 789 | 2.18E-05 | 1.10E-02 |
| BIP & AAA        | 15  | 78640760  | 79259009  | 1.71E-04  | 0.873  | 1.88E-04          | 2.03E-04          | 1.63E-09 | 202 | 2.41E-05 | 1.10E-02 |
| BIP & AAA        | 19  | 10030690  | 11279257  | 2.63E-04  | 0.585  | 1.35E-04          | 1.49E-03          | 4.52E-09 | 482 | 9.23E-05 | 3.01E-02 |
| BIP & AAA        | 22  | 43187900  | 43645335  | 1.21E-04  | 1.231  | 1.47E-05          | 6.53E-04          | 8.14E-10 | 257 | 2.31E-05 | 1.10E-02 |

502 **Abbreviations:** SCZ, schizophrenia; AAA, abdominal aortic aneurysm; BIP, bipolar disorder; chr, chromosome; start/end, the start or end  
503 position of the genomic region from the input genome partition file; rho, the estimation of local genetic covariance; corr, the estimation of local  
504 genetic correlation; h<sup>2</sup>\_1/h<sup>2</sup>\_2, The estimation of local heritability of trait 1/2; var, the variance of the estimation of local genetic covariance; m,  
505 the number of SNPs involved in the estimation of local genetic covariance in the genomic region.

506 **Figure Legend**

507

508 **Fig 1. An overview of study design**

509

510 **Fig 2. Global genetic correlation between mental disorders and abdominal aortic aneurysm.**

511 LDSC, linkage disequilibrium score regression; GNOVA, GeNetic cOVariance Analyzer; SCZ, schizophrenia; BIP, bipolar disorder; \*\*\* indicates  $p < 0.001$ ; \*\* indicates  $p < 0.01$ ; \* indicates  $p < 0.05$ ; <sup>ns</sup> indicates no significance.

514

515 **Fig 3. ConjFDR Manhattan plots. The red dashed line represents the threshold of  $p$ -value for conjFDR < 0.05, and the black points are the independent SNPs; SCZ, schizophrenia; BIP,**

517 bipolar disorder; AAA, abdominal aortic aneurysm.

518

519 **Fig 4. The univariate bidirectional causal inference between mental disorders and abdominal aortic aneurysm. MDD, major depression disorder; SCZ, schizophrenia; BIP, bipolar disorder;**

521 AAA, abdominal aortic aneurysm.

522

523 **Fig 5. Mediation effects of risk factors in the causal associations of abdominal aortic aneurysm with depression and schizophrenia. SNPs, single nucleotide polymorphisms; AAA,**

525 abdominal aortic aneurysm; CA, coronary atherosclerosis.

## Section 1: Genetic association

1. **Global correlation:** LDSC + GNOVA
2. **Local correlation:** SUPERGNOVA
3. **Shared loci:** ConjFDR

## Section 2: Causal inference

### 1. Univariable Mendelian Randomization



### 2. Multivariable Mendelian Randomization



### 3. Mediation Mendelian Randomization





Global genetic correlation

**Method**  
LDSC  
GNOVA

Depression

SCZ

BIP

\*\*\*

\*\*\*

\*

\*\*

ns

ns

Depression &amp; AAA



SCZ &amp; AAA



BIP &amp; AAA



| Exposure         | Outcome    | Methods         | OR (95% CI)          | <i>p</i> -value |    | Cochran's Q | <i>p</i> value for heterogeneity* or pleiotropy† |       |
|------------------|------------|-----------------|----------------------|-----------------|----|-------------|--------------------------------------------------|-------|
| Forward analyses |            |                 |                      |                 |    |             |                                                  |       |
| Depression       | AAA        | IVW             | 1.270 (1.071, 1.504) | 0.006           |    | 163.448     | <0.001                                           |       |
|                  |            | MR-Egger        | 0.865 (0.348, 2.149) | 0.754           | ←→ |             |                                                  | 0.404 |
|                  |            | Weighted median | 1.229 (1.063, 1.420) | 0.005           |    |             |                                                  |       |
|                  |            | MR-cML          | 1.184 (1.040, 1.349) | 0.011           |    |             |                                                  |       |
|                  |            | MR-RAPS         | 1.302 (1.190, 1.424) | <0.001          |    |             |                                                  |       |
| SCZ              | AAA        | IVW             | 1.047 (1.010, 1.084) | 0.011           |    | 333.578     | <0.001                                           |       |
|                  |            | MR-Egger        | 1.018 (0.882, 1.174) | 0.809           | ←→ |             |                                                  | 0.692 |
|                  |            | Weighted median | 1.041 (1.002, 1.082) | 0.041           |    |             |                                                  |       |
|                  |            | MR-cML          | 1.041 (1.004, 1.079) | 0.029           |    |             |                                                  |       |
|                  |            | MR-RAPS         | 1.049 (1.025, 1.074) | <0.001          |    |             |                                                  |       |
| BIP              | AAA        | IVW             | 0.980 (0.896, 1.071) | 0.653           | ←→ | 32.604      | 0.002                                            |       |
|                  |            | MR-Egger        | 1.165 (0.656, 2.069) | 0.601           | ←→ |             |                                                  | 0.559 |
|                  |            | Weighted median | 1.024 (0.936, 1.121) | 0.607           |    |             |                                                  |       |
|                  |            | MR-cML          | 0.987 (0.915, 1.065) | 0.737           |    |             |                                                  |       |
|                  |            | MR-RAPS         | 0.978 (0.924, 1.035) | 0.448           |    |             |                                                  |       |
| Reverse analyses |            |                 |                      |                 |    |             |                                                  |       |
| AAA              | Depression | IVW             | 1.010 (0.995, 1.025) | 0.190           |    | 183.629     | <0.001                                           |       |
|                  |            | MR-Egger        | 1.006 (0.969, 1.046) | 0.743           |    |             |                                                  | 0.844 |
|                  |            | Weighted median | 1.001 (0.982, 1.020) | 0.897           |    |             |                                                  |       |
|                  |            | MR-cML          | 1.010 (0.995, 1.024) | 0.187           |    |             |                                                  |       |
|                  |            | MR-RAPS         | 1.010 (0.998, 1.022) | 0.097           |    |             |                                                  |       |
| AAA              | SCZ        | IVW             | 1.007 (0.968, 1.048) | 0.740           |    | 328.312     | <0.001                                           |       |
|                  |            | MR-Egger        | 0.989 (0.891, 1.096) | 0.832           | ←→ |             |                                                  | 0.711 |
|                  |            | Weighted median | 1.004 (0.962, 1.048) | 0.843           |    |             |                                                  |       |
|                  |            | MR-cML          | 0.985 (0.951, 1.020) | 0.390           |    |             |                                                  |       |
|                  |            | MR-RAPS         | 1.007 (0.983, 1.032) | 0.562           |    |             |                                                  |       |
| AAA              | BIP        | IVW             | 0.989 (0.944, 1.037) | 0.646           |    | 183.276     | <0.001                                           |       |
|                  |            | MR-Egger        | 1.005 (0.889, 1.137) | 0.940           | ←→ |             |                                                  | 0.786 |
|                  |            | Weighted median | 1.011 (0.950, 1.075) | 0.735           |    |             |                                                  |       |
|                  |            | MR-cML          | 0.991 (0.946, 1.039) | 0.704           |    |             |                                                  |       |
|                  |            | MR-RAPS         | 0.989 (0.952, 1.027) | 0.560           |    |             |                                                  |       |

\**p*-value for heterogeneity based on Cochran's Q statistic.

†*p*-value or pleiotropy based on MR-Egger regression intercept.
